# Supplementary material for: Sustainable Development and Storage Stability of Orange By-Products Extract Using Natural Deep Eutectic Solvents
Source: MDPI journal article supplement (doi:10.3390/foods11162457), 2022-08-15
Supplement: s1 [file s1]

**Table S1.** Box-Behnken design with the independent variables and responses data of the optimization for the suitable NADES for each bioactive compound.

| Run | Ratio          | NADES (%)      | Time           | LA:Glu                      |                          | LP:MA                       |                          |
|-----|----------------|----------------|----------------|-----------------------------|--------------------------|-----------------------------|--------------------------|
|     | (mL)           | X <sub>2</sub> | (min)          | TPC                         | TFC                      | TPC                         | TFC                      |
|     | X <sub>1</sub> |                | X <sub>3</sub> |                             |                          |                             |                          |
|     |                |                |                | (mgGAE/100g <sub>dw</sub> ) | (mg/100g <sub>dw</sub> ) | (mgGAE/100g <sub>dw</sub> ) | (mg/100g <sub>dw</sub> ) |
| 1   | 15             | 50             | 10             | 1520                        | 31.1                     | 2804                        | 46.8                     |
| 2   | 25             | 75             | 15             | 1740                        | 38.8                     | 2824                        | 42.7                     |
| 3   | 5              | 50             | 5              | 1398                        | 23.7                     | 429                         | 28.5                     |
| 4   | 15             | 30             | 15             | 1925                        | 113.3                    | 3582                        | 120.2                    |
| 5   | 5              | 85             | 5              | 2956                        | 46.0                     | 3381                        | 33.0                     |
| 6   | 25             | 30             | 20             | 1942                        | 28.9                     | 2569                        | 41.8                     |
| 7   | 10             | 50             | 30             | 2687                        | 153.2                    | 3712                        | 146.6                    |
| 8   | 15             | 30             | 15             | 1920                        | 109.2                    | 3580                        | 120.5                    |
| 9   | 15             | 30             | 15             | 1921                        | 116.3                    | 3578                        | 121.3                    |
| 10  | 10             | 75             | 30             | 3873                        | 167.3                    | 2990                        | 70.0                     |
| 11  | 20             | 30             | 5              | 1753                        | 29.9                     | 2645                        | 39.4                     |
| 12  | 25             | 85             | 15             | 2001                        | 52.4                     | 3895                        | 51.1                     |
| 13  | 10             | 85             | 30             | 4973                        | 203.7                    | 3232                        | 45.3                     |
| 14  | 5              | 75             | 5              | 2124                        | 22.7                     | 1954                        | 25.6                     |
| 15  | 5              | 40             | 20             | ND                          | ND                       | ND                          | ND                       |
| 16  | 25             | 30             | 30             | 2852                        | 159.7                    | 4021                        | 123.1                    |
| 17  | 25             | 50             | 20             | 1107                        | 56.5                     | 1561                        | 50.9                     |
| 18  | 15             | 75             | 10             | 2360                        | 20.6                     | 4108                        | 41.2                     |
| 19  | 15             | 30             | 15             | 1922                        | 112.6                    | 3577                        | 124.0                    |
| 20  | 5              | 30             | 5              | 1435                        | 47.4                     | 786                         | 47.45                    |

X<sub>1</sub>: solid/liquid ratio, X<sub>2</sub>: %NADES, X<sub>3</sub>: extraction time, TPC: Total phenolic content, TFC: Total flavonoid content, ND: Not detected, Glu: glucose, MA: malic acid, LA: lactic acid, LP: L-proline.

**Table S2:** Analysis of variance (ANOVA) for the fitted quadratic polynomial model for optimization of TPC and TFC using LA: Glu as solvent.

| LA:Glu                        |          |         |                      |          |         |                      |
|-------------------------------|----------|---------|----------------------|----------|---------|----------------------|
| Source                        | TPC      |         |                      | TFC      |         |                      |
|                               | SS       | F-value | p-value              | SS       | F-value | p-value              |
| <b>Model</b>                  | 1533.71  | 133.91  | < 0.0001*            | 61492.02 | 306.60  | < 0.0001*            |
| X <sub>1</sub> -Ratio         | 1741.50  | 13.69   | 0.0049*              | 315.53   | 14.16   | 0.0045*              |
| X <sub>2</sub> -NADES         | 3723.52  | 29.28   | 0.0004*              | 3465.88  | 155.53  | < 0.0001*            |
| X <sub>3</sub> -Time          | 2037.53  | 16.02   | 0.0031*              | 8410.14  | 377.40  | < 0.0001*            |
| X <sub>1</sub> X <sub>2</sub> | 4626.54  | 36.38   | 0.0002*              | 1144.33  | 51.35   | < 0.0001**           |
| X <sub>1</sub> X <sub>3</sub> | 37855.13 | 2.98    | 0.1186 <sup>ns</sup> | 18.56    | 0.8330  | 0.3852 <sup>ns</sup> |
| X <sub>2</sub> X <sub>3</sub> | 2253.52  | 17.71   | 0.0023*              | 314.33   | 14.11   | 0.0045*              |
| X <sub>1</sub> <sup>2</sup>   | 2577.57  | 20.27   | 0.0015*              | 218.35   | 9.80    | 0.0121*              |
| X <sub>2</sub> <sup>2</sup>   | 1317.60  | 103.60  | < 0.0001*            | 2862.31  | 128.44  | < 0.0001*            |
| X <sub>3</sub> <sup>2</sup>   | 2650.51  | 20.84   | 0.0014*              | 921.90   | 41.37   | 0.0001*              |
| <b>Residual</b>               | 1145.54  |         |                      | 200.56   |         |                      |
| <i>Lack of Fit</i>            | 96524.88 | 4.31    | 0.0911 <sup>ns</sup> | 174.50   | 5.36    | 0.0645 <sup>ns</sup> |
| <i>Pure Error</i>             | 17930.91 |         |                      | 26.06    |         |                      |
| <b>C.V. %</b>                 | 5.05     |         |                      | 5.85     |         |                      |
| <b>R<sup>2</sup></b>          | 0.99     |         |                      | 0.99     |         |                      |
| <b>Adjusted R<sup>2</sup></b> | 0.98     |         |                      | 0.99     |         |                      |

TPC: Total phenolic content, TFC: Total flavonoid content, Glu: glucose, LA: lactic acid. Significant at  $p < 0.05$ , ns Not significant at  $p > 0.05$ . C.V: Coefficient of variation, SS: Sum of squares.

**Table S3:** Analysis of variance (ANOVA) for the fitted quadratic polynomial model for optimization of TPC and TFC using LP:MA as solvent of squares.

| LP:MA                         |          |         |                      |          |         |                      |
|-------------------------------|----------|---------|----------------------|----------|---------|----------------------|
| Source                        | TPC      |         |                      | TFC      |         |                      |
|                               | SS       | F-value | p-value              | SS       | F-value | p-value              |
| <b>Model</b>                  | 1999.70  | 826.03  | < 0.0001*            | 29938.42 | 293.83  | < 0.0001*            |
| X <sub>1</sub> -Ratio         | 50035.89 | 18.61   | 0.0020*              | 2807.40  | 247.98  | < 0.0001*            |
| X <sub>2</sub> -NADES         | 36020.60 | 1339.90 | < 0.0001*            | 4497.46  | 397.26  | < 0.0001*            |
| X <sub>3</sub> -Time          | 3609.60  | 1342.27 | < 0.0001*            | 11458.21 | 1012.11 | < 0.0001*            |
| X <sub>1</sub> X <sub>2</sub> | 3340.50  | 124.24  | < 0.0001*            | 441.28   | 38.98   | 0.0002*              |
| X <sub>1</sub> X <sub>3</sub> | 7233.50  | 269.03  | < 0.0001*            | 2127.45  | 187.92  | < 0.0001*            |
| X <sub>2</sub> X <sub>3</sub> | 4025.60  | 1497.23 | < 0.0001*            | 4631.05  | 409.06  | < 0.0001*            |
| X <sub>1</sub> <sup>2</sup>   | 2245.60  | 834.95  | < 0.0001*            | 78.23    | 6.91    | 0.0274 <sup>ns</sup> |
| X <sub>2</sub> <sup>2</sup>   | 4519.60  | 1680.77 | < 0.0001*            | 1352.80  | 119.49  | < 0.0001*            |
| X <sub>3</sub> <sup>2</sup>   | 6505.50  | 241.95  | < 0.0001*            | 341.76   | 30.19   | 0.0004*              |
| <b>Residual</b>               | 24197.37 |         |                      | 101.89   |         |                      |
| <i>Lack of Fit</i>            | 21241.88 | 5.75    | 0.0575 <sup>ns</sup> | 90.07    | 6.10    | 0.0522 <sup>ns</sup> |
| <i>Pure Error</i>             | 2955.49  |         |                      | 11.82    |         |                      |
| <b>C.V. %</b>                 | 1.78     |         |                      | 4.84     |         |                      |
| <b>R<sup>2</sup></b>          | 0.99     |         |                      | 0.99     |         |                      |
| <b>Adjusted R<sup>2</sup></b> | 0.99     |         |                      | 0.99     |         |                      |

TPC: Total phenolic content, TFC: Total flavonoid content, LP: L-proline, MA: malic acid. Significant at  $p < 0.05$ , ns Not significant at  $p > 0.05$ . C.V: Coefficient of variation, SS: Sum.
